# Supplementary material for: Imitating the microenvironment of native biofilms using nanofibrous scaffolds to emulate chronic wound infections
Source: Royal Society of Chemistry journal article supplement (doi:10.1039/d2tb02700c), 2023-01-01
Supplement: d2tb02700c1.pdf [file d2tb02700c1.pdf]

## **Supporting Information**

# **Imitating the microenvironment of native biofilms by nanofibrous scaffolds for emulating chronic wound infections**

*Jana Wächter, Pia K Vestweber, Nathalie Jung, Maike Windbergs\**

Institute of Pharmaceutical Technology and Buchmann Institute for Molecular Life Sciences,

Goethe University Frankfurt, Max-von-Laue-Str. 9, 60438 Frankfurt am Main, Germany

\*E-Mail: [windbergs@em.uni-frankfurt.de](mailto:windbergs@em.uni-frankfurt.de)

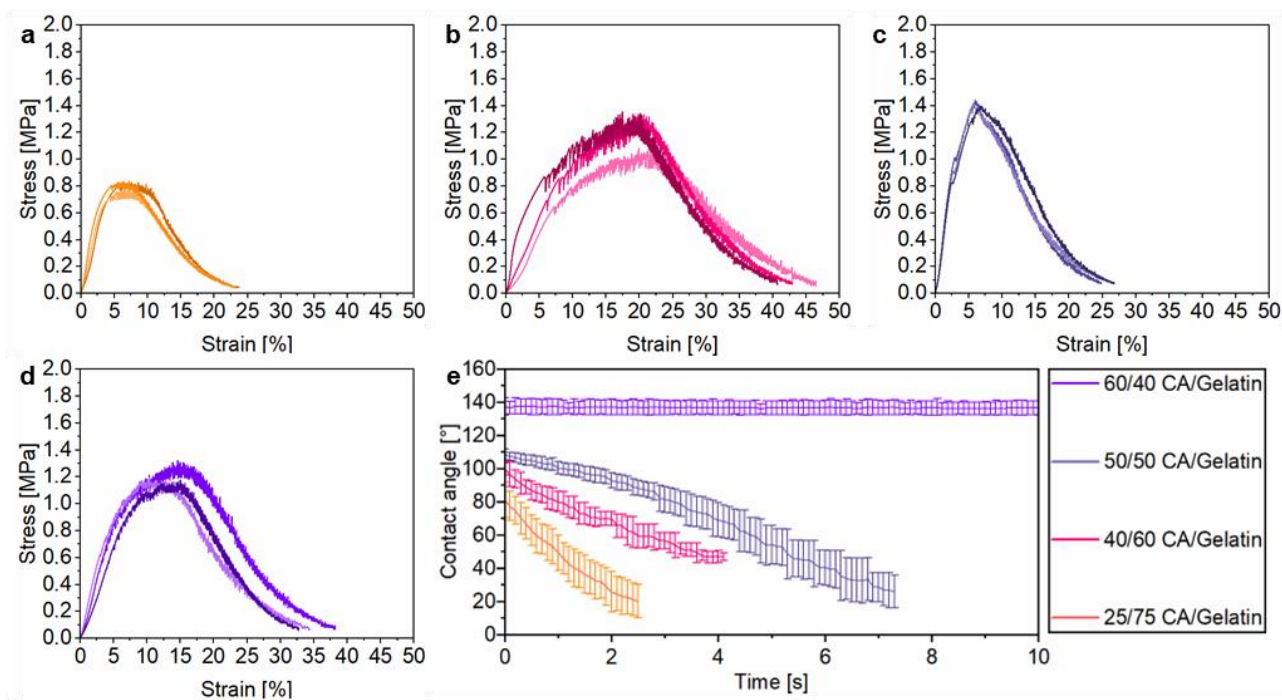

**Fig. S1** Systematic evaluation of electrospun fibers composed of cellulose acetate (CA) and gelatin in different ratios regarding their physicochemical properties. Stress-strain-curves of electrospun fiber mats of CA and gelatin in ratios of (a) 25/75, (b) 40/60, (c) 50/50 and (d) 60/40 as well as (e) contact angle measurements of all scaffolds.

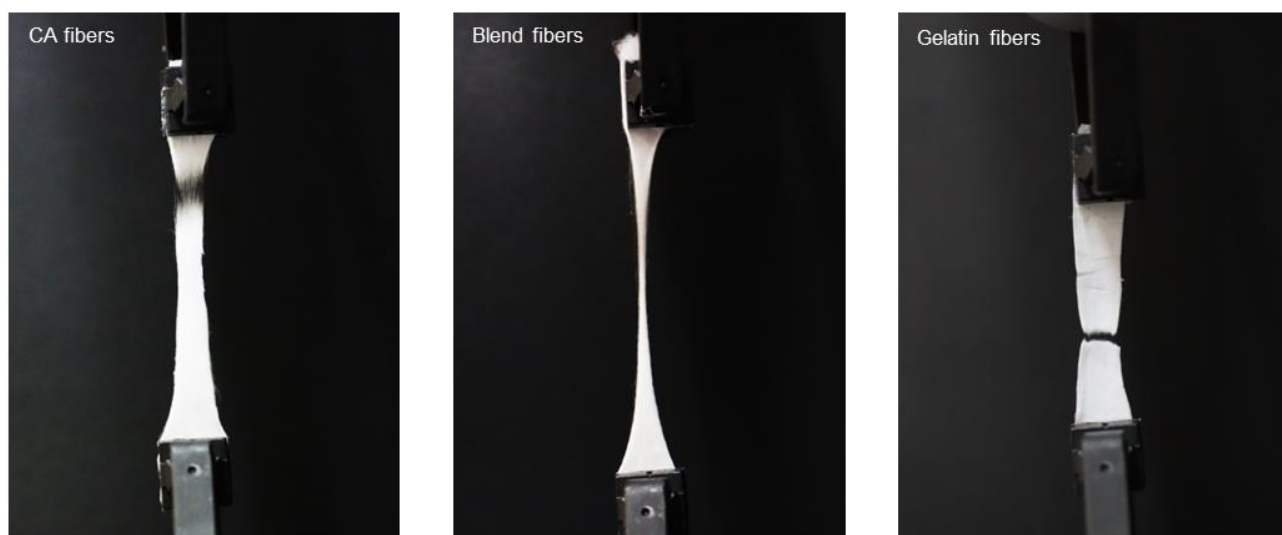

**Fig. S2** Photographs of CA, blend, and gelatin fiber scaffolds after failure during tensile testing experiments.

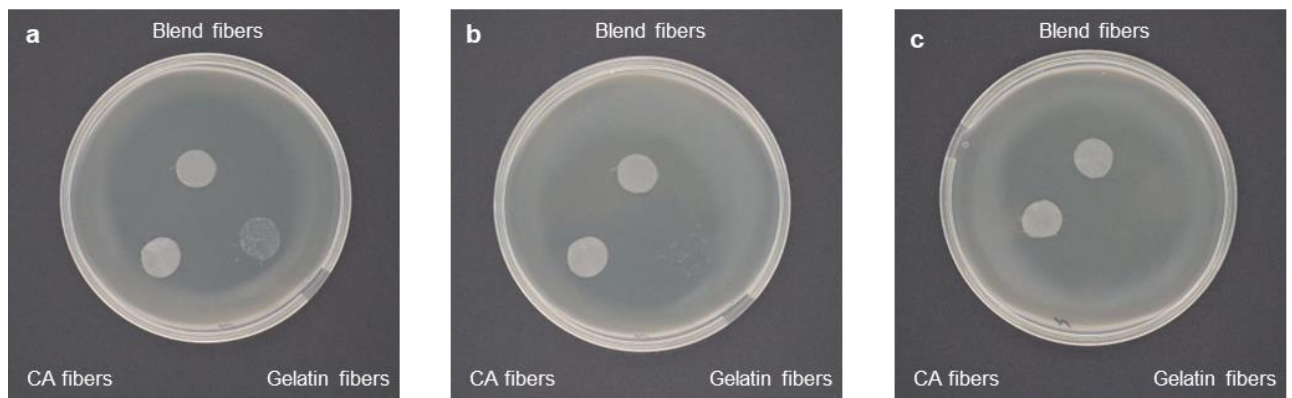

**Fig. S3** Photographs of CA, blend and gelatin fiber scaffolds placed on nutrient agar plates (a) right after contact and after (b) 2 and (c) 48 h incubation.

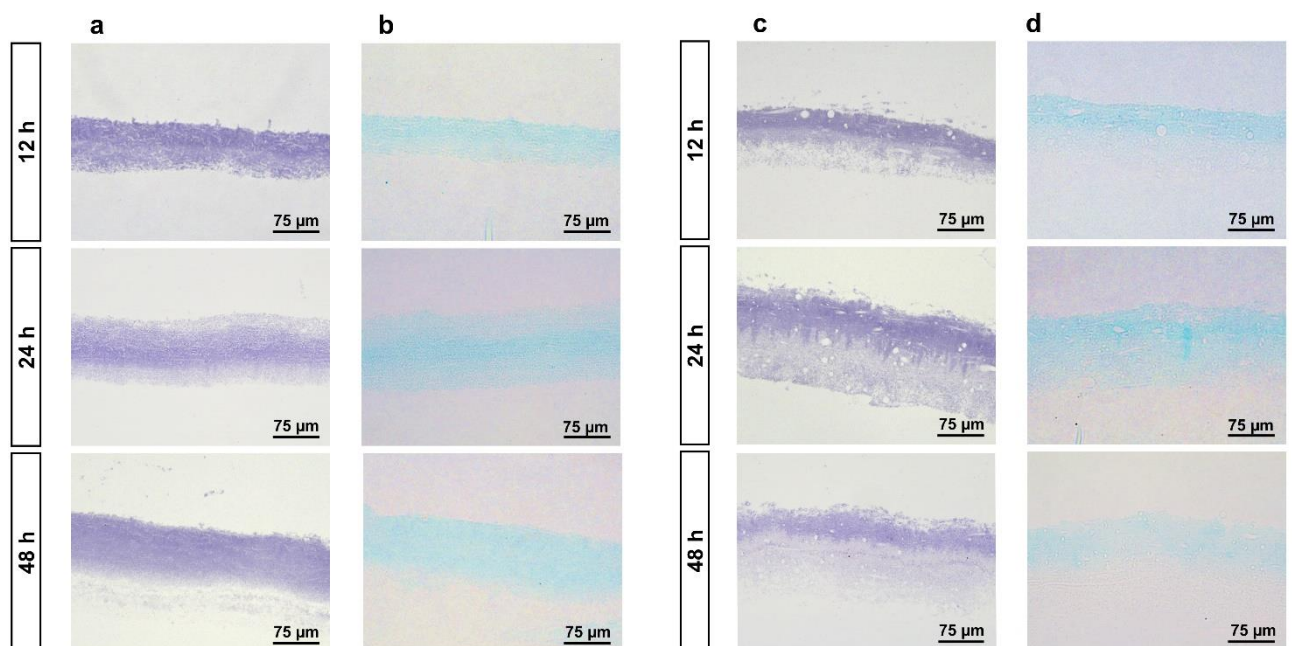

**Fig. S4** Hematoxylin (a, c) and alcian blue (b, d) staining of cross-sections of CA (a, b) and blend (c, d) fibers after 12, 24 and 48 h incubation with *Pseudomonas aeruginosa*.

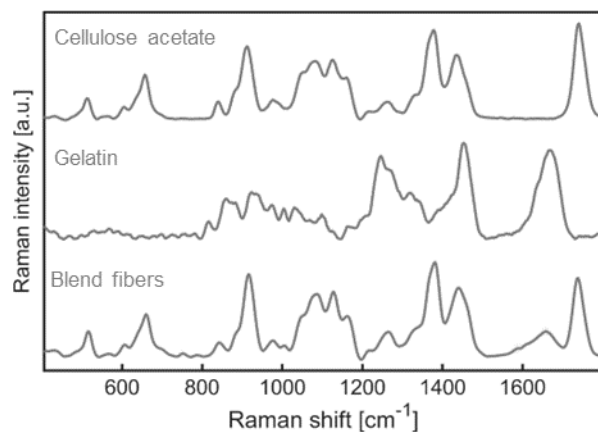

**Fig. S5** Raman spectra of reference substances and blend fibers.

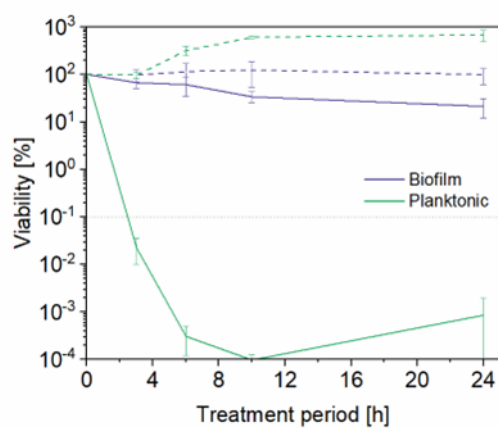

**Fig. S6** Viability of bacteria from blend fiber-based biofilm models and planktonic *Pseudomonas aeruginosa* after treatment with PBS (---) or gentamicin (—) over 24 h. Viability under 0.1% indicates a biocidal effect of the treatment.

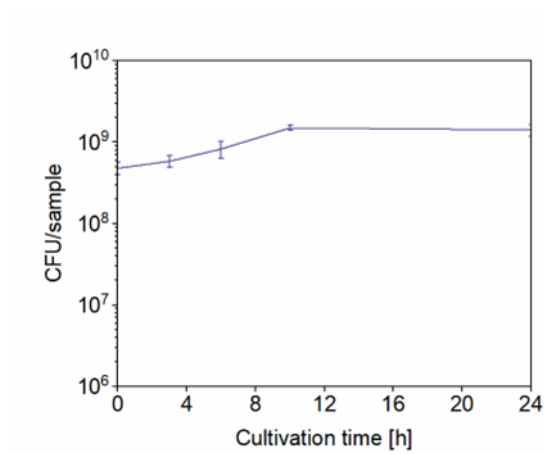

**Fig. S7** Growth curve of *P. aeruginosa* from blend-fiber based biofilm models on *ex vivo* human skin wounds.

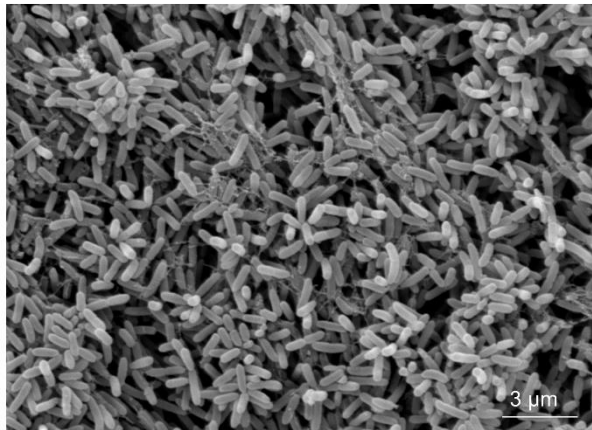

**Fig. S8** SEM micrograph of a *P. aeruginosa* biofilm co-cultivated with human skin wounds for 24 h.
